# Supplementary material for: Insulin/Snail1 axis ameliorates fatty liver disease by epigenetically suppressing lipogenesis
Source: PubMed Central journal article supplement (PMC6048127; doi:10.1038/s41467-018-05309-y), 2018-07-16
Supplement: 41467_2018_5309_MOESM1_ESM.pdf [file 41467_2018_5309_MOESM1_ESM.pdf]

**Insulin/Snail1 Axis Ameliorates Fatty Liver Disease by  
Epigenetically Suppressing Lipogenesis**

Liu Y *et. al.*

**Supplementary Figures**

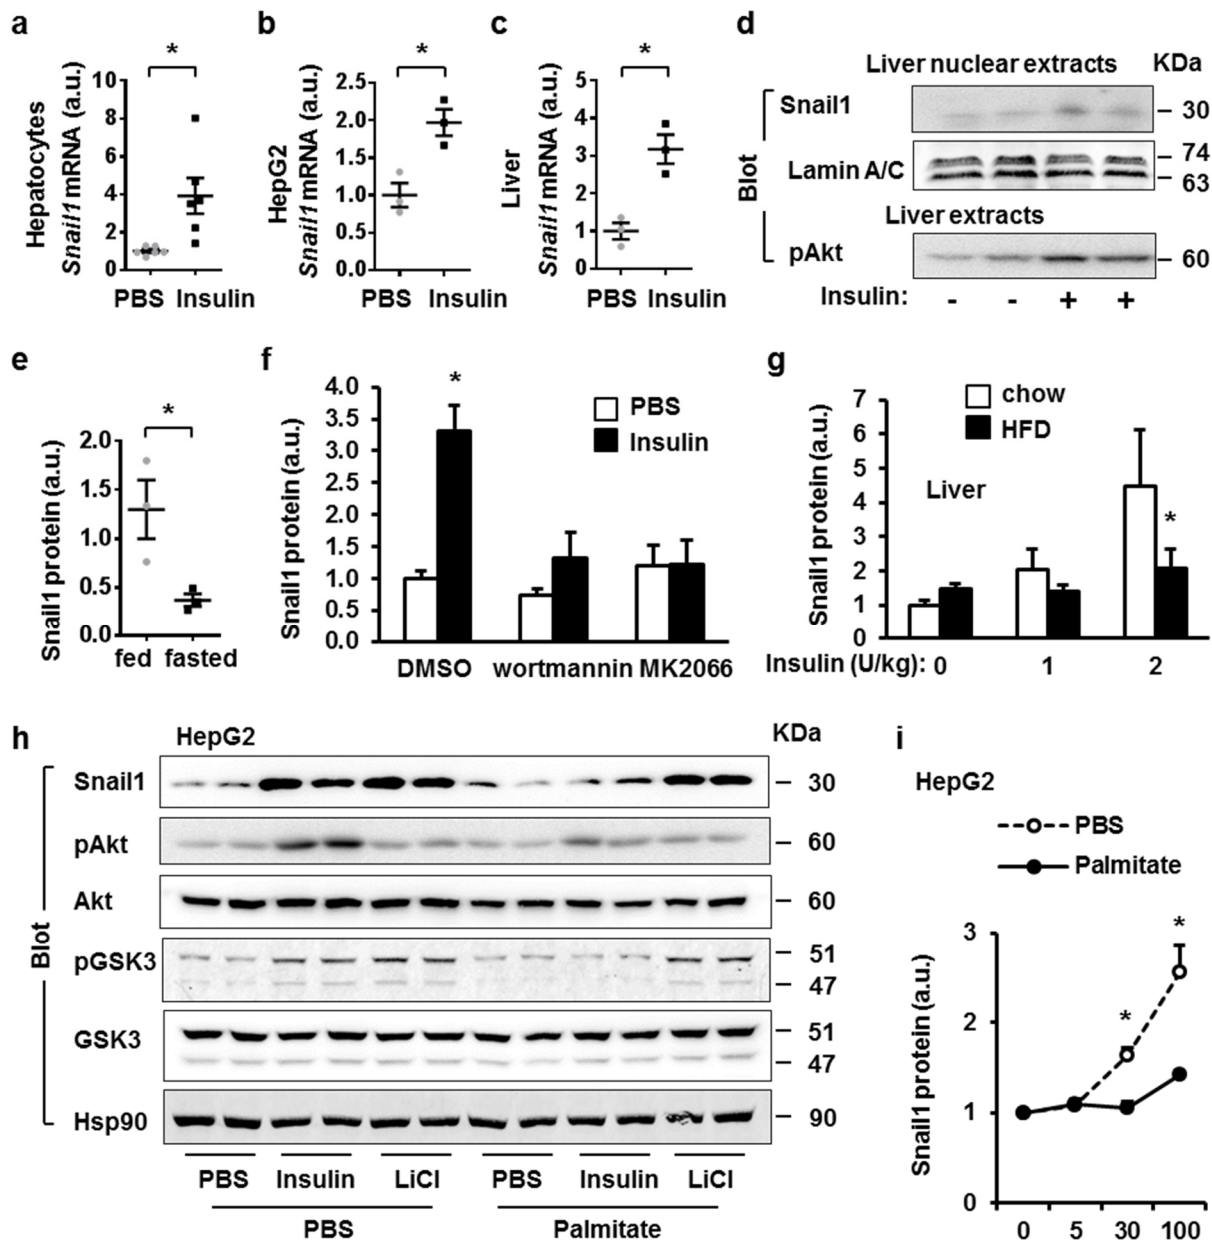

**Supplementary Figure 1** Insulin upregulates hepatic Snail1. **a** Primary hepatocytes were deprived of serum overnight and stimulated with 50 nM insulin or PBS for 2 h. *Snail1* mRNA abundance was quantified by qPCR and normalized to 36B4 levels (n=4). **b** HepG2 cells were deprived of serum overnight and stimulated with 100 nM insulin for 2 h. *Snail1* mRNA levels were quantified by qPCR (normalized to GAPDH levels; n=3). **c-d** C57BL/6 male mice (8-10 wks) were fasted overnight and stimulated with insulin (0.5 units/kg body weight, i.p.) or PBS for 2 h. **c** Liver *Snail1* mRNA levels were quantified by qPCR (normalized to 36B4 levels; n=3). **d** Liver nuclear extracts were immunoblotted with antibodies against Snail1 and lamin A/C. **e** Mouse liver nuclear Snail1 levels (normalized to lamin A/C) at the fed and the overnight fasted states (n=5). **f** Snail1 protein in Fig. 1a was normalized to Hsp90 levels. **g** C57BL/6 mice (n=3) were fed a chow or HFD diet and treated with insulin at the indicated doses for 2 h. Liver nuclear Snail1 levels were normalized to lamin A/C levels. **h-i** HepG2 cells were pretreated with palmitate (100  $\mu$ M) overnight. **h** The cells were then stimulated with insulin (100 nM) or LiCl (25 mM) for 2 h. Cell extracts were immunoblotted with the indicated antibodies. **i** The cells were then stimulated with insulin at the indicated concentrations for 2 h. Snail1 levels were quantified (normalized to Hsp90 levels) (n=3). Data are presented as mean  $\pm$  SEM. \*p<0.05, 2-tailed unpaired Student's *t* test.

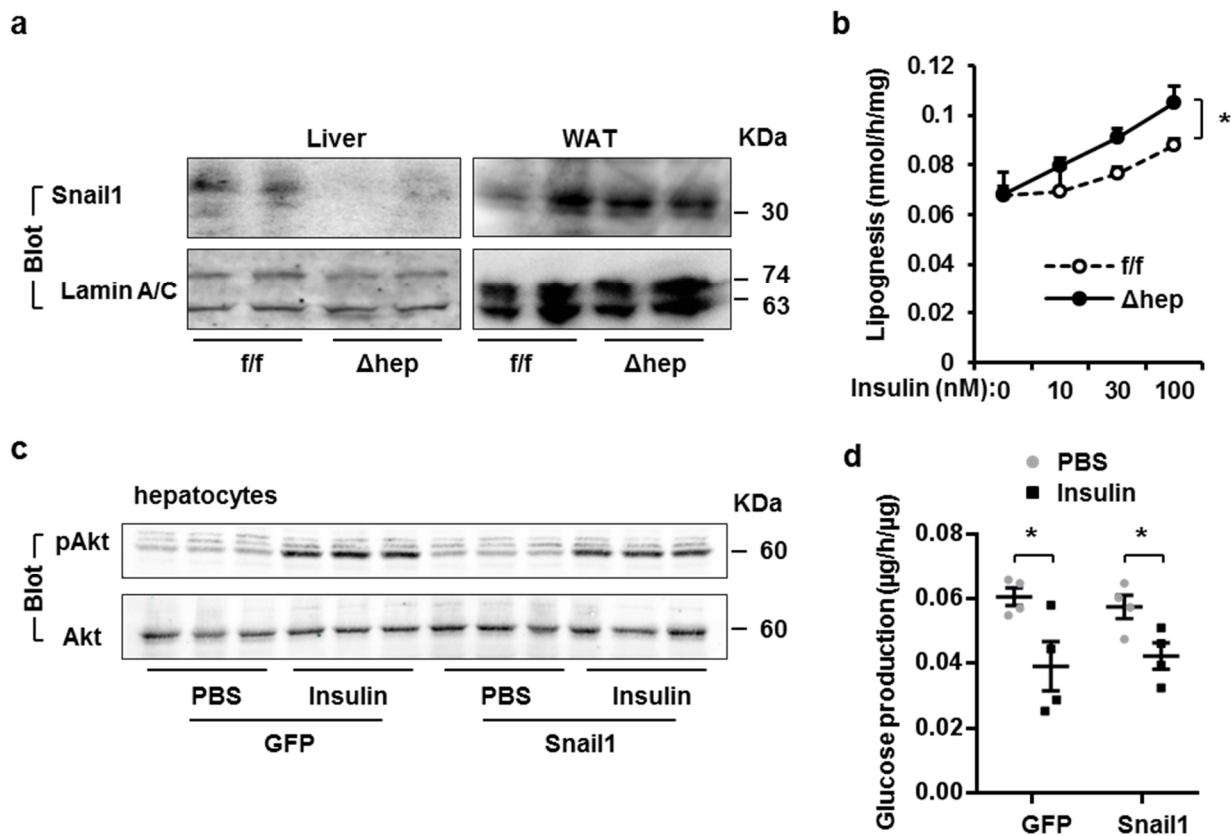

**Supplementary Figure 2** Snail1 does not directly regulate insulin signaling and gluconeogenesis in hepatocytes. **a** *Snail1<sup>flox/flox</sup>* (f/f) and *Snail1<sup>flox/flox</sup>;CreERT2* ( $\Delta$ hep) males were treated with tamoxifen. Liver and WAT nuclear extracts were isolated 2 wks after tamoxifen treatment and immunoblotted with the indicated antibodies. **b** Primary hepatocytes were stimulated with insulin for 12 h, and lipogenesis were measured. Data were analyzed using ANOVA. **c-d** Primary hepatocytes were transduced with GFP or Snail1 adenoviral vectors. **c** The cells were deprived of serum overnight and stimulated with 100 nM insulin for 30 min. Cell extracts were immunoblotted with anti-phospho-Akt (pSer473) or anti-Akt antibodies. **d** The cells were deprived of serum overnight and stimulated with 100 nM insulin or PBS for 6 h in KRB buffer. Glucose production (n=4) was measured and normalized to total protein levels as we described previously (*Liu et al. Endocrinology, 158:1207-1216, 2017*). Data are presented as mean  $\pm$  SEM. \* $p < 0.05$ , 2-tailed unpaired Student's *t* test or ANOVA.

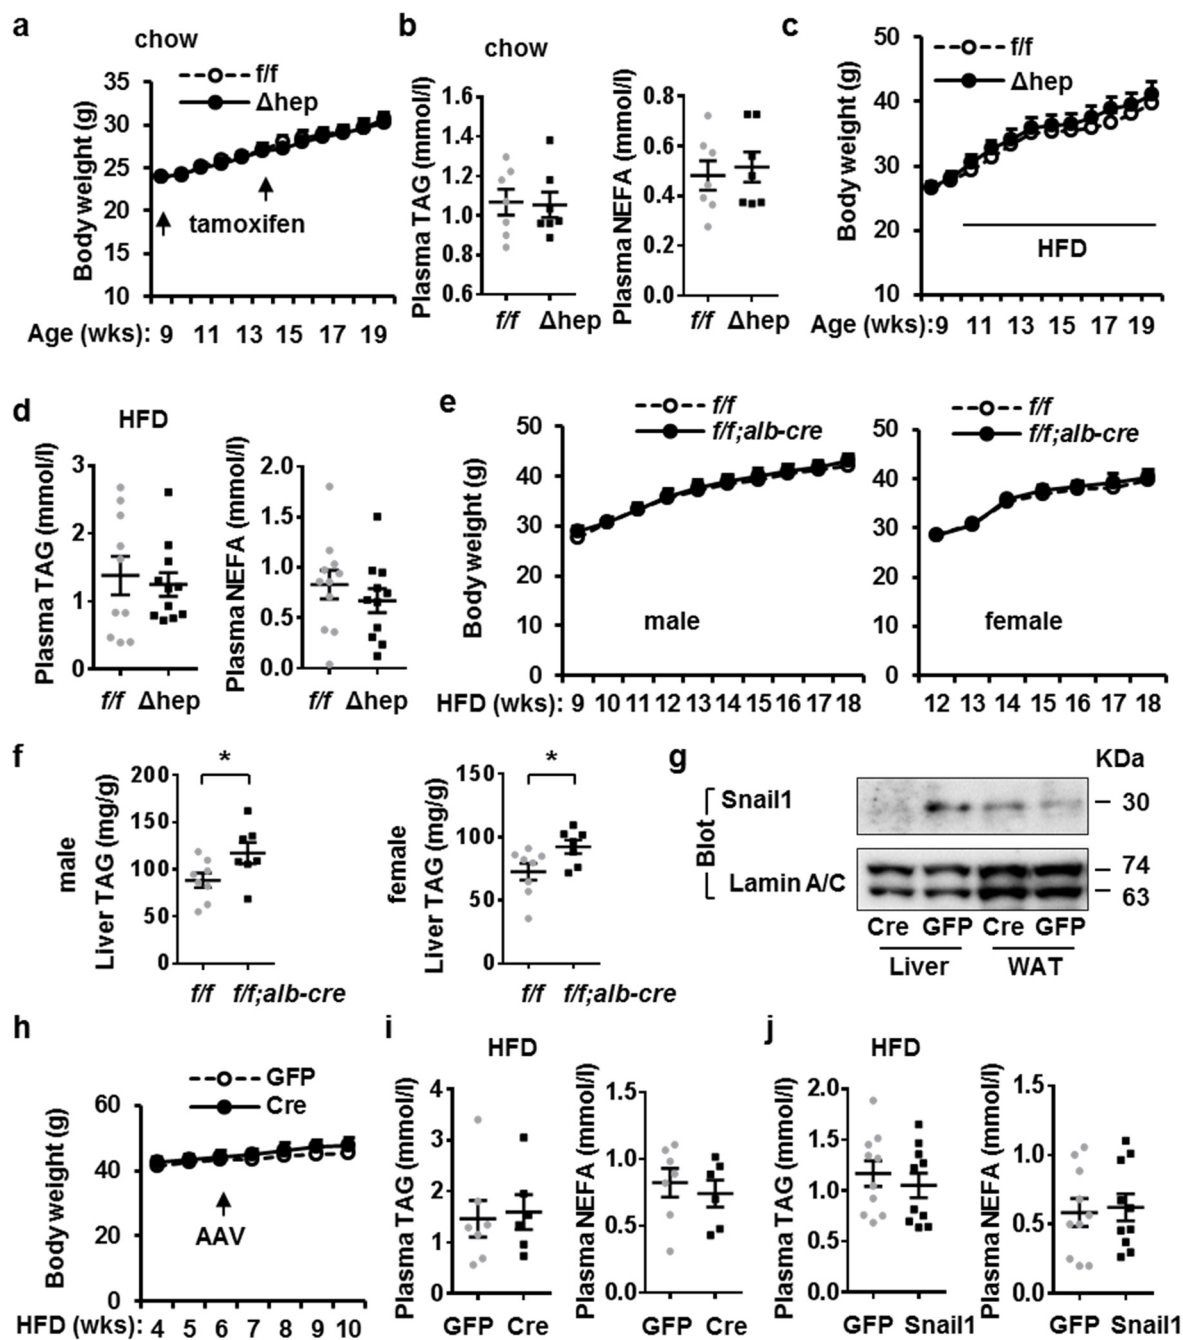

**Supplementary Figure 3** Hepatocyte-specific deletion of *Snail1* promotes NAFLD. **a-b** *Snail1<sup>flox/flox</sup>* (*f/f*; n=7) and *Snail1<sup>flox/flox</sup>;CreERT2* ( $\Delta$ hep; n=8) males were treated with tamoxifen twice as indicated, and growth curves were monitored. **b** Plasma TAG and NEFA levels. **c-d** *Snail1<sup>flox/flox</sup>* (n=11) and *Snail1<sup>\Delta</sup>hep* (n=11) male littermates were fed a HFD for 10 wks. **c** Growth curves. **d** Plasma TAG and NEFA levels. **e-f** *Snail1<sup>flox/flox</sup>* (male: n=8, female: n=8) and *Snail1<sup>flox/flox</sup>;albumin-cre* (male: n=8, female: n=7) mice were fed a HFD for 10 wks. **e** Body weight. **f** Liver TAG levels. **g-i** *Snail1<sup>flox/flox</sup>* males were fed a HFD for 6 wks, transduced with AAV-GFP (n=7) or AAV-Cre (n=6) vectors, and fed a HFD for additional 4 wks. **g** Liver and WAT nuclear extracts were immunoblotted with the indicated antibodies. **h** Growth curves. AAV transduction time was marked. **i** Plasma TAG and NEFA levels. **j** C57BL/6 mice fed a HFD and transduced with GFP (n=9) or *Snail1* (n=10) adenoviral vectors as described in Fig. 4a. Plasma TAG and NEFA levels were measured 3 wks after transduction. Data are presented as mean  $\pm$  SEM.

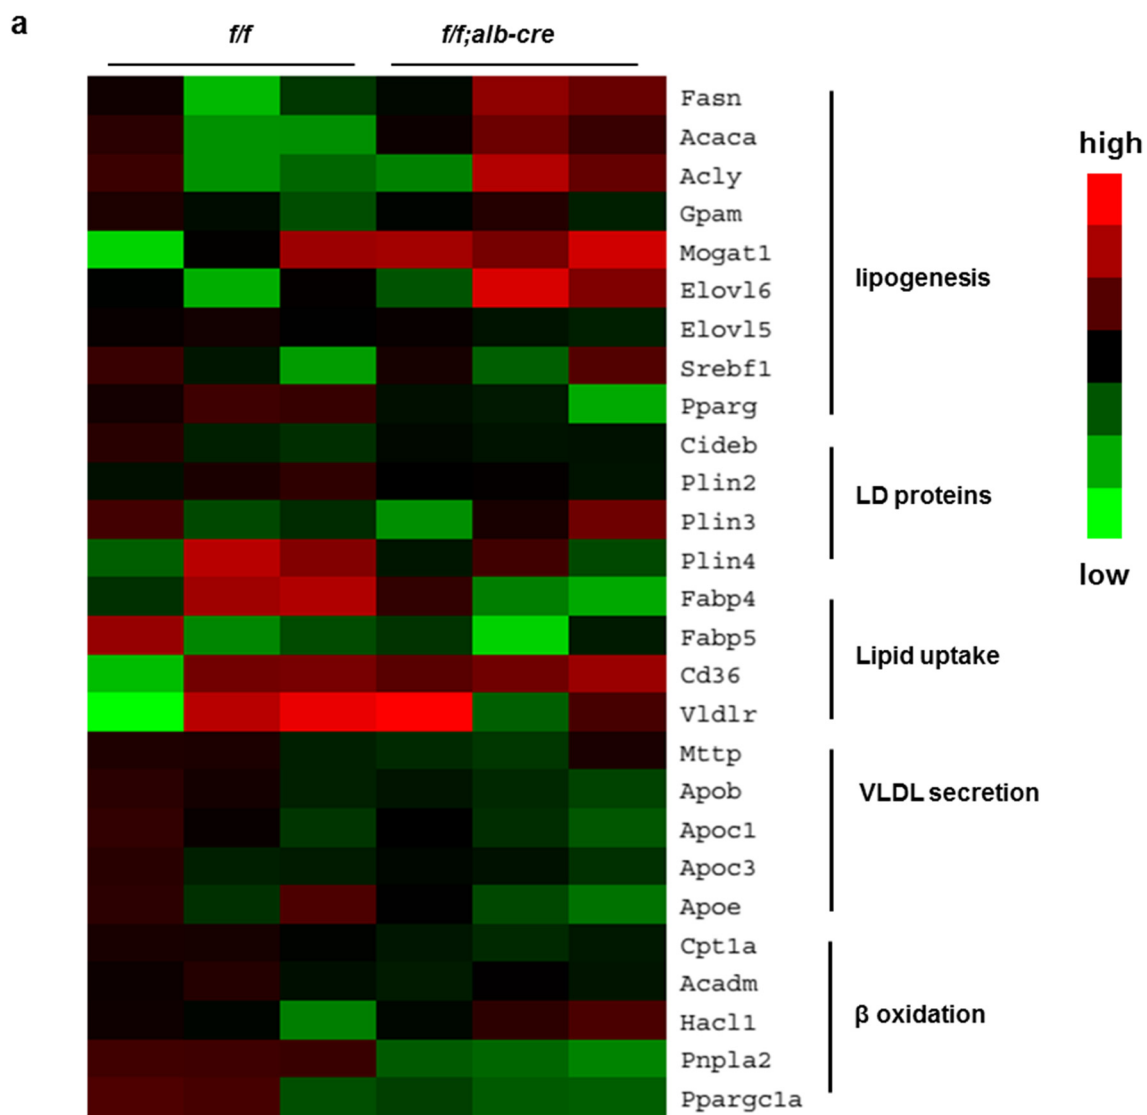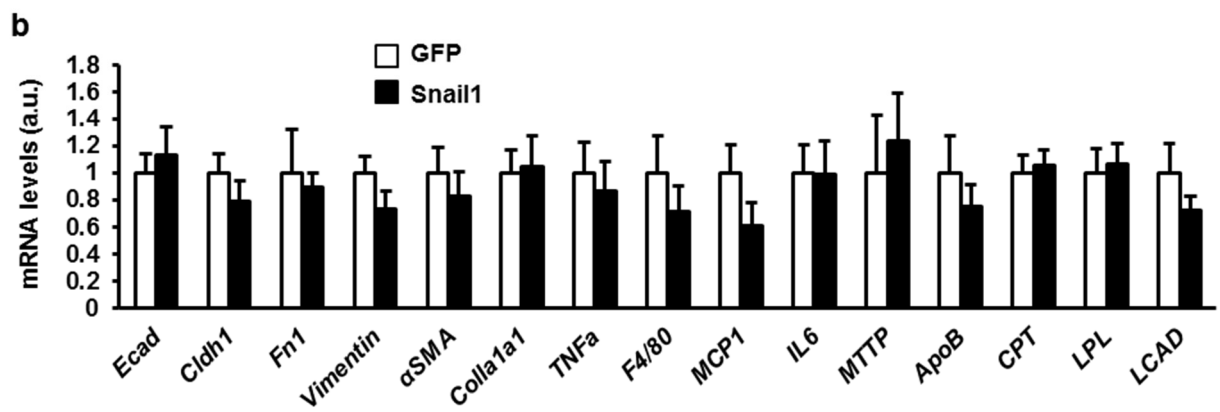

**Supplementary Figure 4** Hepatocyte Snail1 suppresses the hepatic lipogenic program. **a** *Snail1<sup>fllox/fllox</sup>* and *Snail1<sup>fllox/fllox</sup>;albumin-Cre* male mice were fed a HFD for 10 wks. Livers were harvested under non-fasting conditions and subjected to Affymetrix GeneChip Arrays analysis. Gene expression was presented using a heatmap. **b** C57BL/6 mice were fed a HFD for 6 wks and transduced with GFP (n=5) or Snail1 (n=5) adenoviral vectors. Liver gene expression was measured by qPCR 4 wks later, and normalized to 36B4 levels. Data are presented as mean  $\pm$  SEM.

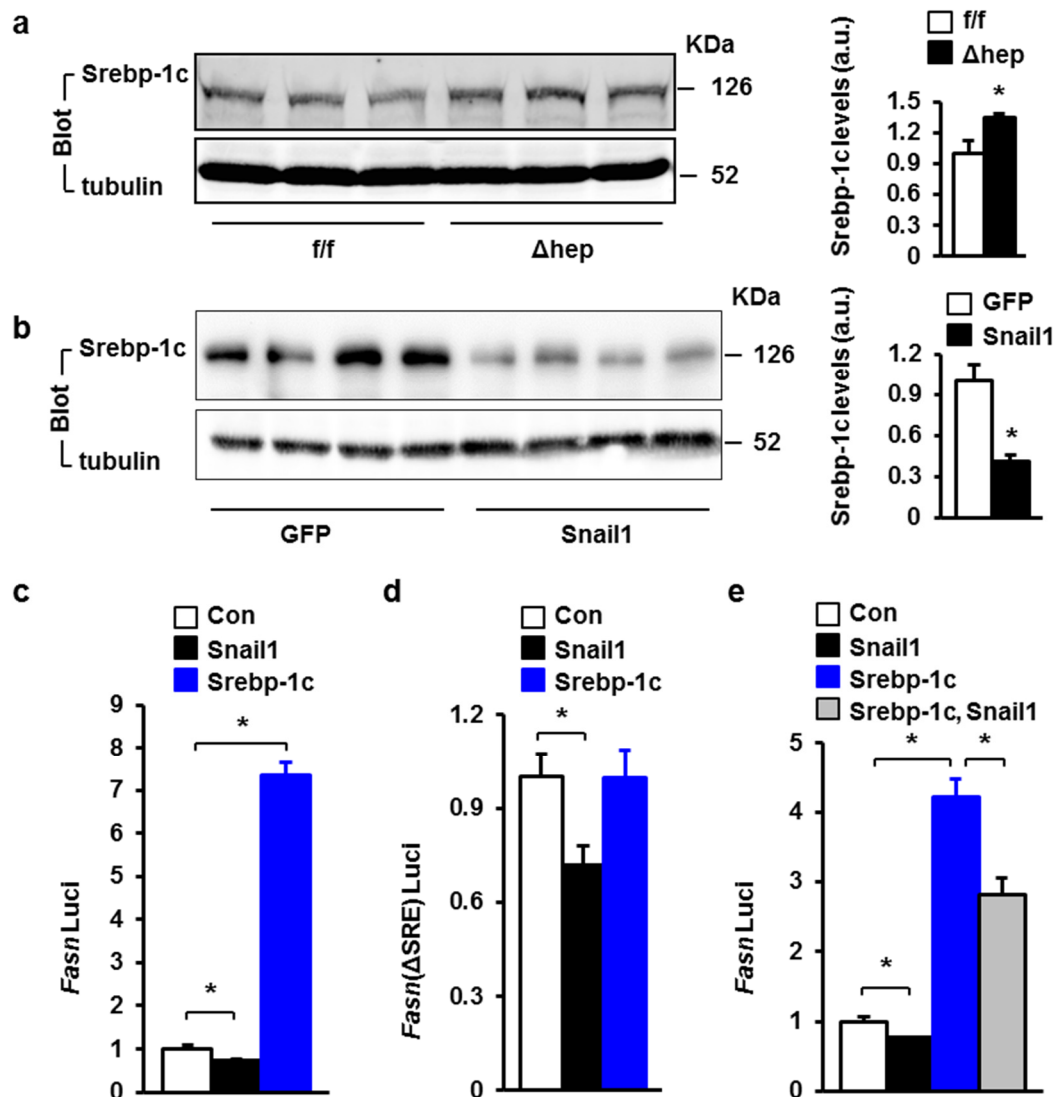

**Supplementary Figure 5** Snail1 downregulates Srebp-1c in the liver. **a** *Snail1<sup>fllox/fllox</sup>* and *Snail1<sup>Δhep</sup>* male littermates were fed a HFD for 10 wks. Liver extracts were immunoblotted with antibodies against Srebp-1c and  $\alpha$ -tubulin. Srebp-1c levels were normalized to  $\alpha$ -tubulin levels. **b** C57BL/6 mice were fed a HFD for 7 wks and transduced with GFP or Snail1 adenoviral vectors for 3 wks. Liver Srebp-1c levels were normalized to  $\alpha$ -tubulin levels. **c-e** *Fasn* and *Fasn* ( $\Delta$ SRE) luciferase activities in HepG2 cells transfected with the indicated expression plasmids. Data are presented as mean  $\pm$  SEM. \* $p < 0.05$ , 2-tailed unpaired Student's *t* test.

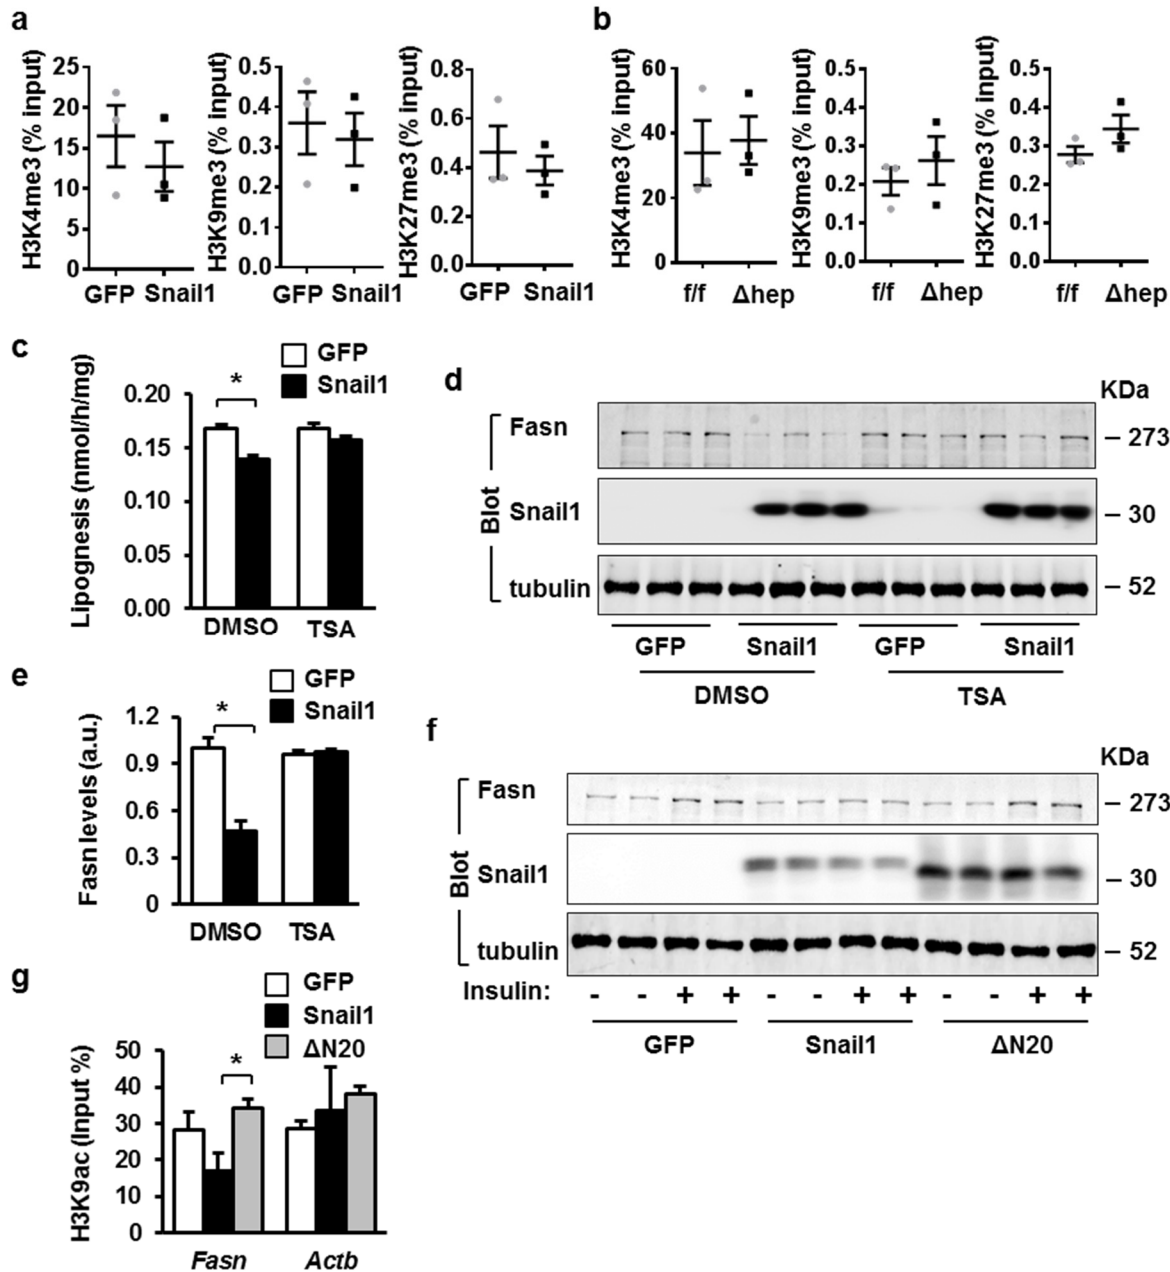

**Supplementary Figure 6** Snail1 epigenetically suppresses hepatic *Fasn* expression. **a** C57BL/6 male mice (8-9 wks) were fed a HFD for 7 wks and then transduced with Snail1 (n=3) or GFP (n=3) adenoviral vectors. Livers were harvested 3 wks after transduction. The levels of H3Kme3, H3K9me3, and H3K27me3 on the *Fasn*, *NCH*, or *Actb* promoter were measured in the liver by ChIP-qPCR and normalized to inputs. **b** *Snail1* <sup>$\Delta$ hep</sup> (n=3) and *Snail1*<sup>fl<sub>ox</sub>/fl<sub>ox</sub></sup> (n=3) males were fed a HFD for 10 wks. The levels of H3K4me3, H3K9me3, and H3K27me3 on the *Fasn*, *NCH*, or *Actb* promoter were measured in the liver and normalized to inputs. **c-e** Primary hepatocytes were transduced with Snail1 and treated with TSA. **c** Lipogenesis (normalized to protein levels) (n=3). **d-e** Hepatocyte extracts were immunoblotted with the indicated antibodies. *Fasn* levels were normalized to  $\alpha$ -tubulin levels. **f** Primary hepatocytes were transduced with Snail1 or  $\Delta$ N20 adenoviral vectors for 24 h, and then stimulated with insulin (50 nM) for 12 h. Cell extracts were immunoblotted with the indicated antibodies. **g** Primary hepatocytes were transduced with Snail1,  $\Delta$ N20, or GFP adenoviral vectors. H3K9ac levels on the *Fasn* promoter were measured by ChIP. Data are presented as mean  $\pm$  SEM. \*p<0.05, 2-tailed unpaired Student's *t* test.

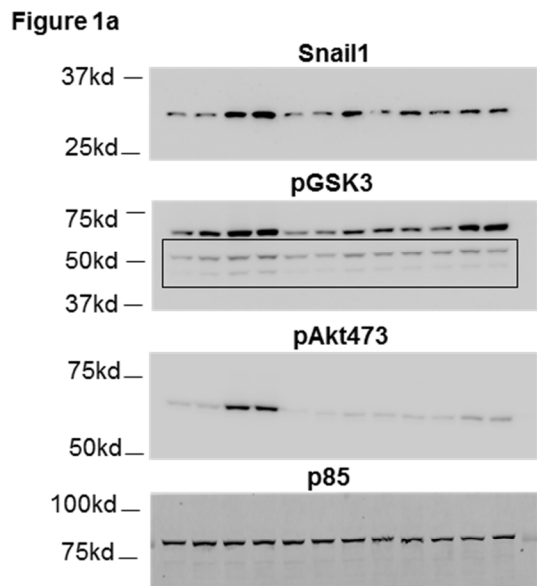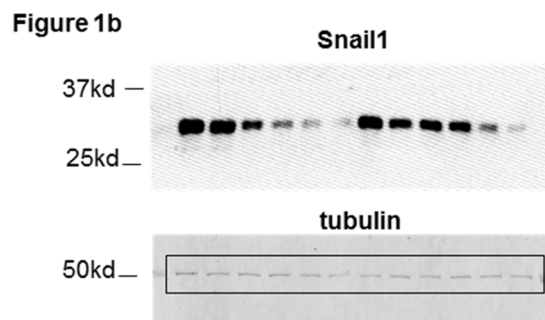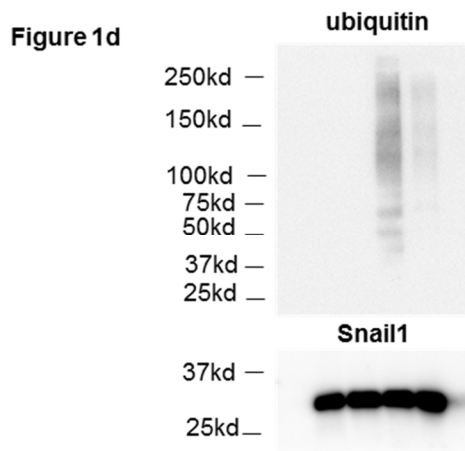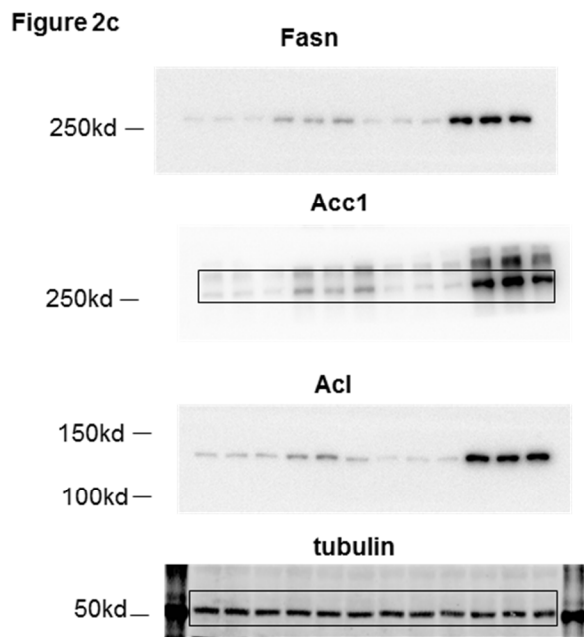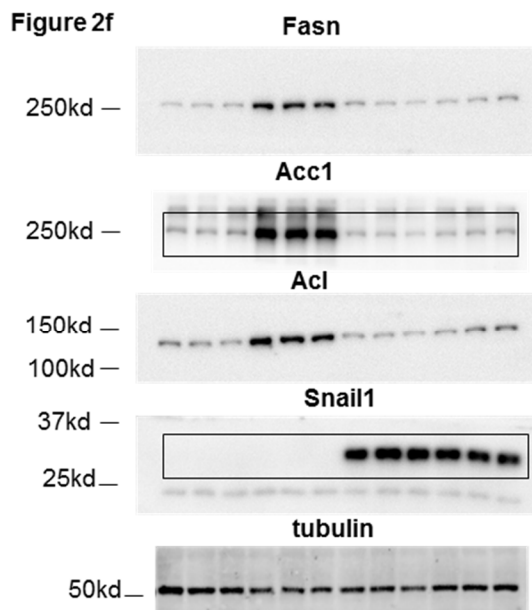

**Supplementary Figure 7** The uncropped scans of western blots and gels for Figures 1-2.



Figure 4a

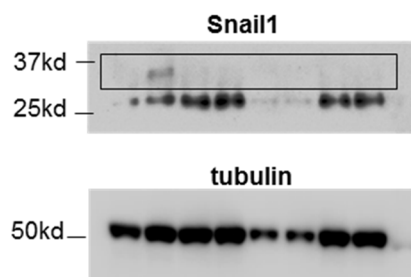

Figure 5b

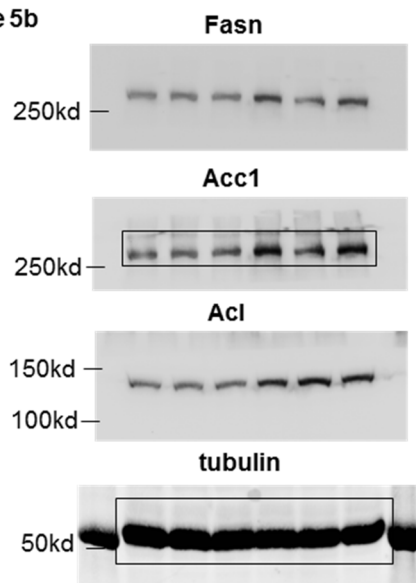

Figure 5d

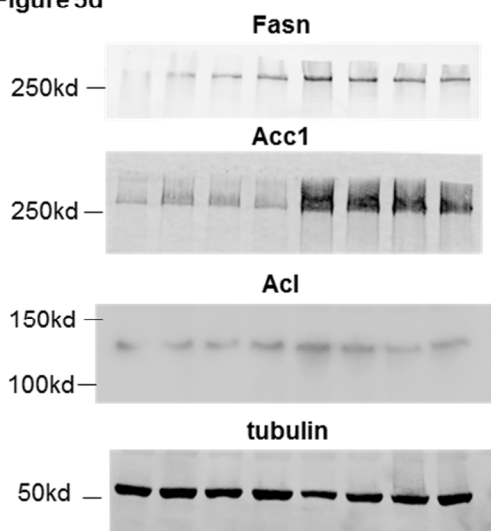

Figure 5d

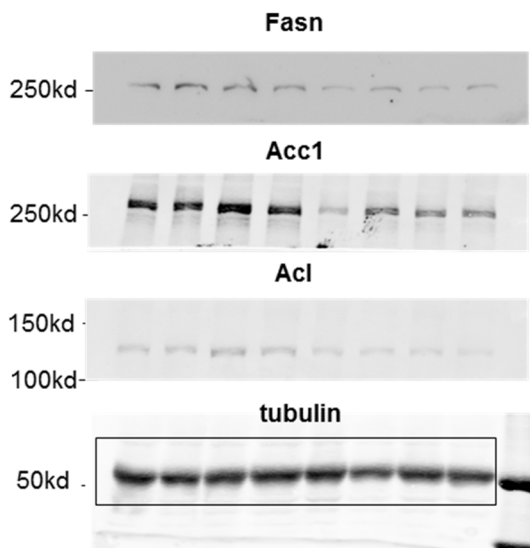

Supplementary Figure 8 The uncropped scans of western blots and gels for Figures 4-5.

Figure 6a

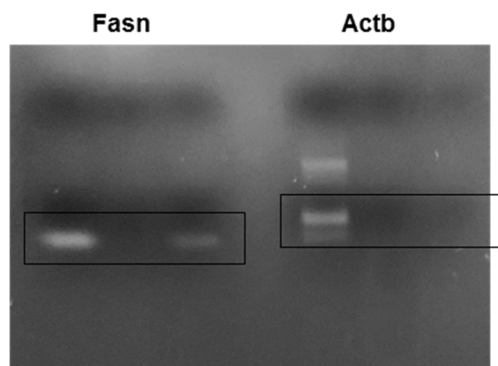

Figure 6c

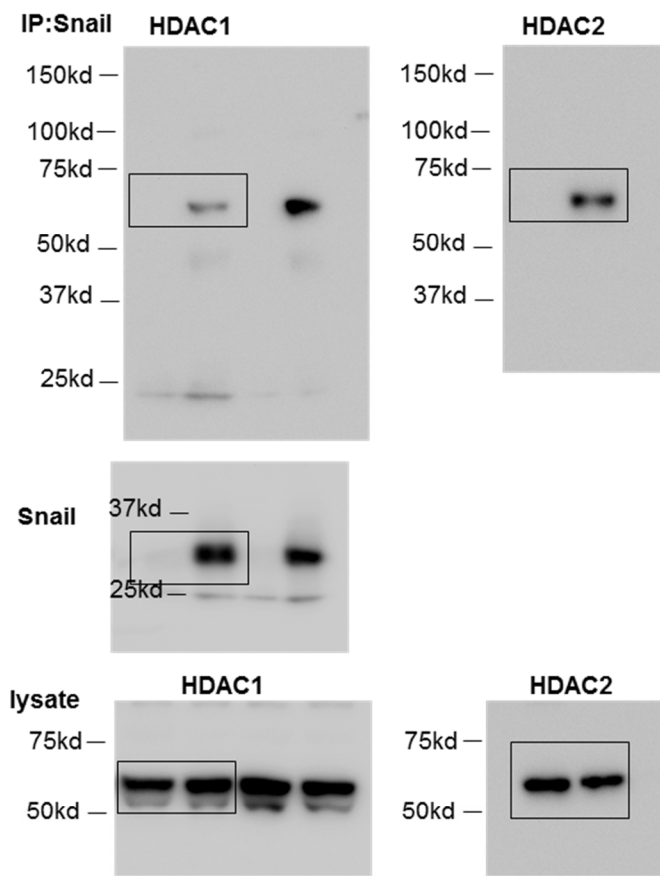

Figure 7d

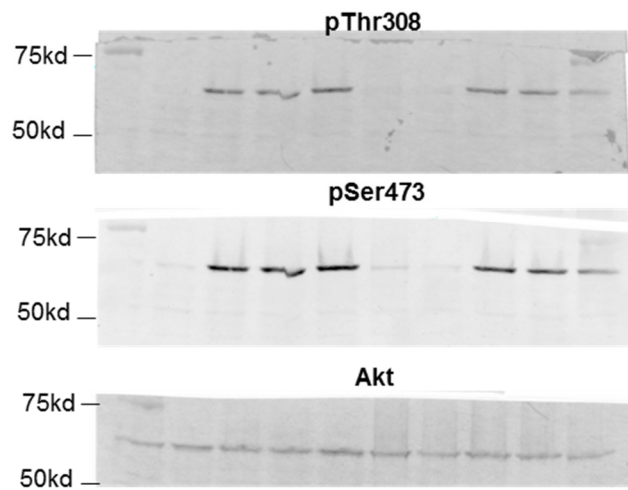

Supplementary Figure 9 The uncropped scans of western blots and gels for Figures 6-7.

**Supplementary Table 1 Antibodies**

| <b>ANTIBODY</b>   | <b>SOURCE</b>             | <b>IDENTIFIER</b> | <b>DILUTION</b> |
|-------------------|---------------------------|-------------------|-----------------|
| Snail1            | Cell Signaling Technology | #3895             | 1:1000          |
| Lamin A/C         | Cell Signaling Technology | #4777             | 1:2000          |
| p-Akt (pThr308)   | Cell Signaling Technology | #13038            | 1:5000          |
| p-Akt (pSer473)   | Cell Signaling Technology | #4060             | 1:5000          |
| Akt               | Cell Signaling Technology | #4685             | 1:2000          |
| $\alpha$ -tubulin | Santa Cruz                | sc-5286           | 1:10000         |
| Fasn              | Cell Signaling Technology | #3180             | 1:5000          |
| ACC1              | Cell Signaling Technology | #3676             | 1:5000          |
| ACL               | Cell Signaling Technology | #13390            | 1:5000          |
| HDAC1             | Cell Signaling Technology | #5356             | 1:1000          |
| HDAC2             | Cell Signaling Technology | #5113             | 1:1000          |
| Snail1            | Cell Signaling Technology | #3879             | 1:200           |
| H3K9ac            | Cell Signaling Technology | #9649             | 1:200           |
| H3K9me3           | Cell Signaling Technology | #13969            | 1:200           |
| H3K27ac           | EMD Millipore             | 07-360            | 1:200           |
| H3K27me3          | Cell Signaling Technology | #9733             | 1:200           |
| H3K4me3           | Cell Signaling Technology | #9751             | 1:200           |
| pGSK3             | Cell Signaling Technology | #8566             | 1:3000          |
| GSK3              | Cell Signaling Technology | #5676             | 1:3000          |
| HSP90             | Cell Signaling Technology | #4877             | 1:5000          |
| HA                | U-M Hybridoma Core        | 12C5              | 1:1000          |
| Ubiquitin         | Santa Cruz                | sc-8017           | 1:1000          |
| Srebp-1c          | Santa Cruz                | Sc-13551          | 1:500           |

**Supplementary Table 2** qPCR and ChIP primers

| <b>Genes</b>                  | <b>Forward</b>           | <b>Reverse</b>           |
|-------------------------------|--------------------------|--------------------------|
| <i>Snail1</i> (mouse)         | CCTTGTGTCTGCACGACCTGT    | CACTGGTATCTCTTCACATCCG   |
| <i>Snail1</i> (human)         | TCGGAAGCCTAACTACAGCGA    | AGATGAGCATTGGCAGCGAG     |
| <i>Fasn</i>                   | TTGACGGCTCACACACCTAC     | CGATCTTCCAGGCTCTTCAG     |
| <i>ACC1</i>                   | CAGGGACTATGTCCTGAAGCA    | GGAATCCATTGTGGAGAGGA     |
| <i>Srebp-1c</i>               | AACGTCACTTCCAGCTAGAC     | CCACTAAGGTGCCTACAGAGC    |
| <i>Lxra</i>                   | GAGTTCTCCAGAGCCATGAATG   | ATATGTGTGTTGCAGCCTCTCT   |
| <i>MTTP</i>                   | CTCCACAGTGCAGTTCTCACA    | AGAGACATATCCCCTGCCTGT    |
| <i>apoB</i>                   | CCAGAGTGTGGAGCTGAATGT    | TTGCTTTTTAGGGAGCCTAGC    |
| <i>Cpt1a</i>                  | CTGATGACGGCTATGGTGT      | GTGAGGCCAAACAAGGTGATA    |
| <i>LPL</i>                    | AGAAGGGAAAGGACTCAGCAG    | TCAAACACCCAAACAAGGGTA    |
| <i>LCAD</i>                   | CACTCAGATATTGTCATGCCCT   | TCCATTGAGAATCCAATCACTC   |
| <i>Ecad</i>                   | ACCGGAAGTGACTCGAAATG     | GCTGCCTTCAGGTTTTTCATC    |
| <i>Cldh1</i>                  | GGGACAACATCGTGACCG       | AGGAGTCGAAGACTTTGCACT    |
| <i>Fn1</i>                    | ATGTGGACCCCTCCTGATAGT    | GCCCAGTGATTCAGCAAAGG     |
| <i>vimentin</i>               | GACCTCACTGCTGCCCTGCG     | GACTCCTGCTTGGCCTGGCG     |
| $\alpha$ SMA                  | GTTCAAGTGGTGCCTCTGTCA    | ACTGGGACGACATGGAAAAG     |
| <i>Colla 1a1</i>              | TCACCTACAGCACCCCTTGTG    | GGTGGAGGGAGTTTACACGA     |
| <i>TNF<math>\alpha</math></i> | CATCTTCTCAAATTCGAGTGACAA | TGGGAGTAGACAAGGTACAACCC  |
| <i>F4/40</i>                  | CTTTGGCTATGGGCTTCCAGTC   | GCAAGGAGGACAGAGTTTATCGTG |
| <i>MCP1</i>                   | ACTGAAGCCAGCTCTCTTTCCTC  | TTCCTTCTTGGGGTCAGCACAGAC |
| <i>IL6</i>                    | AGCCAGAGTCCTTCAGA        | GGTCCTTAGCCACTCCT        |
| <i>ACL</i>                    | CCTCAAGGACTTCGTCAAACA    | GCCCATACTCCTTCTTAGCAC    |
| <i>34B4</i>                   | AAGCGCGTCCTGGCATTGTCT    | CCGCAGGGGCAGCAGTGGT      |
| <i>GAPDH</i> (human)          | CGACCACTTTGTCAAGCTCA     | AGGGGTCTACATGGCAACTG     |
| <i>Fasn</i> (ChIP)            | TGCAACCGTAGTCCAACGAG     | GCCTCAGCGGAAGTCATCAG     |
| <i>NCH</i> (ChIP)             | GGATGGCTCCAAGATAAGGCA    | ACAACATCCACACGTCCAGT     |
| <i>Actb</i> (ChIP)            | AATAGCCTCCGCCCTTGTG      | CGTGACATCCACACCCAGA      |
